# Supplementary material
Source: PubMed Central journal article supplement (PMC3522178)

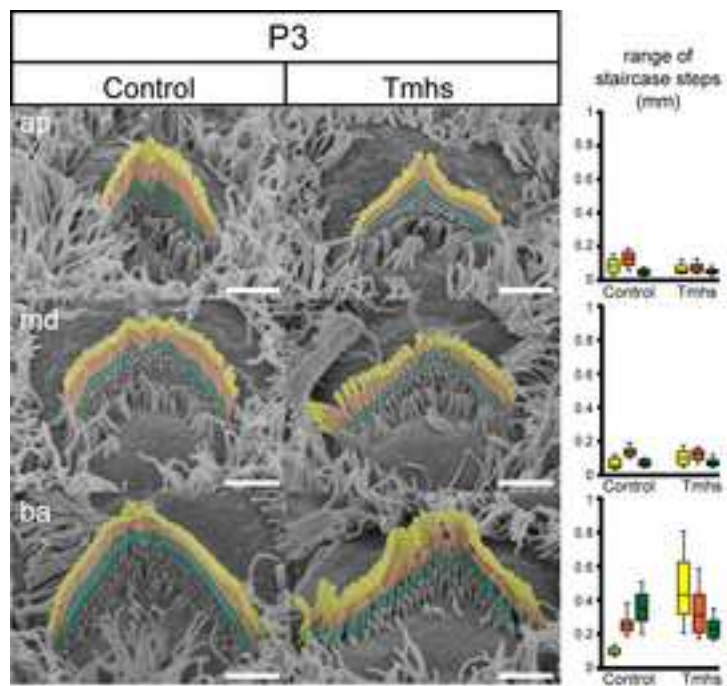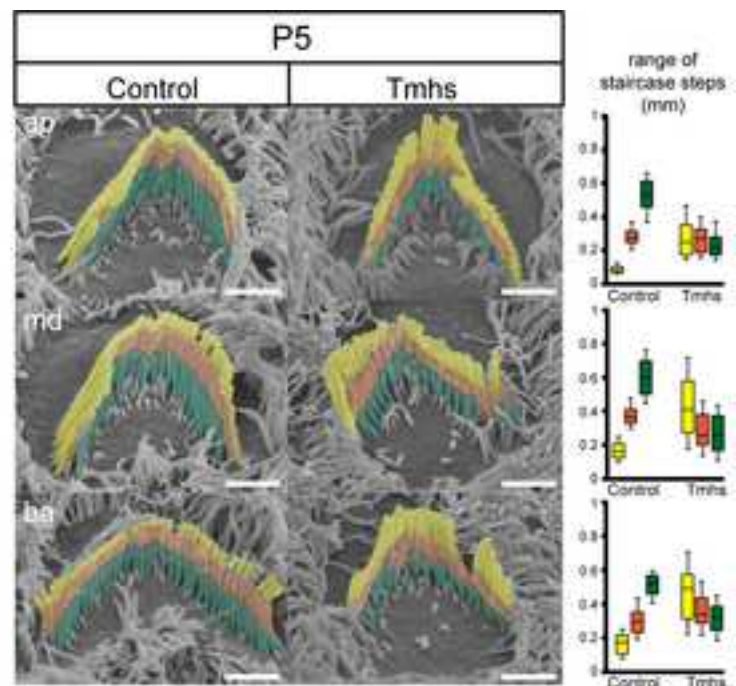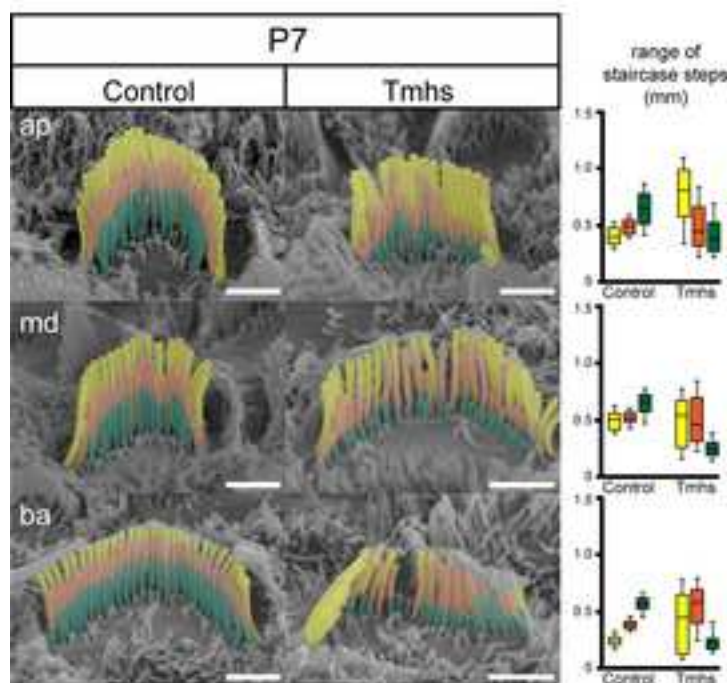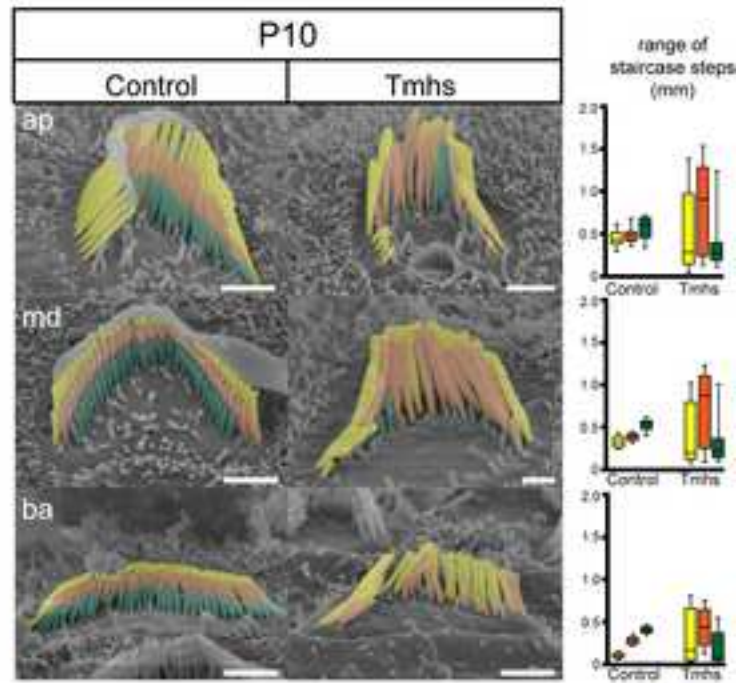

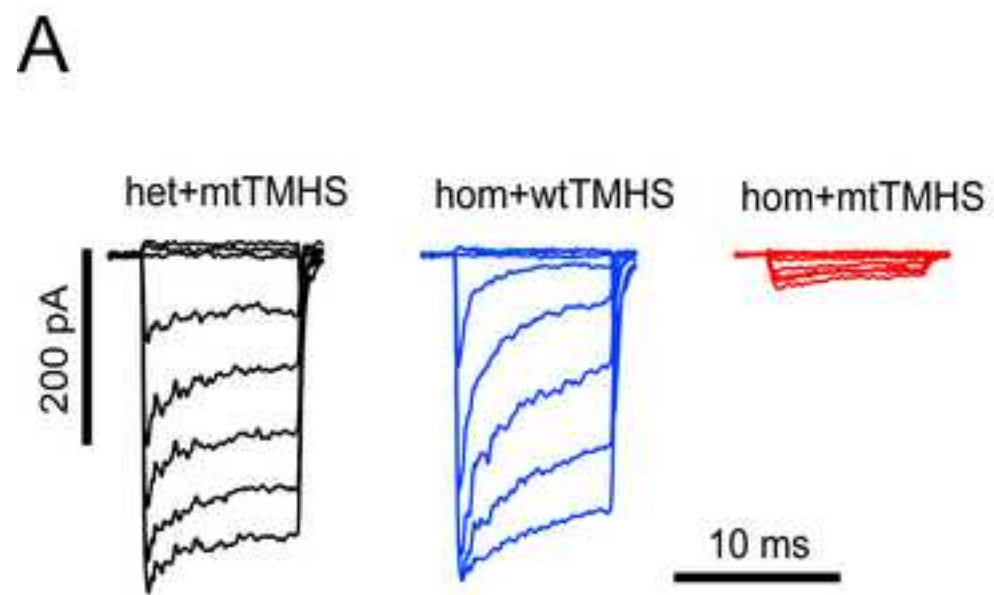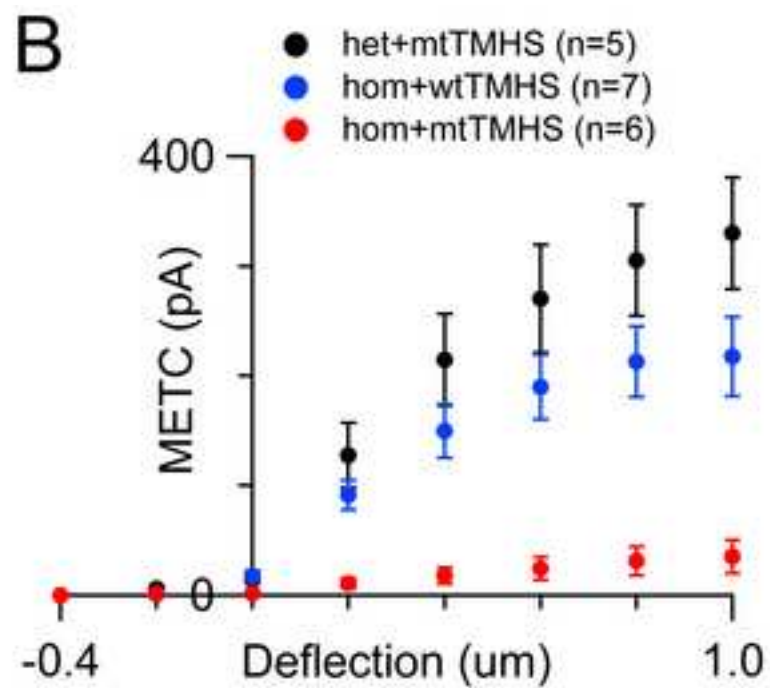

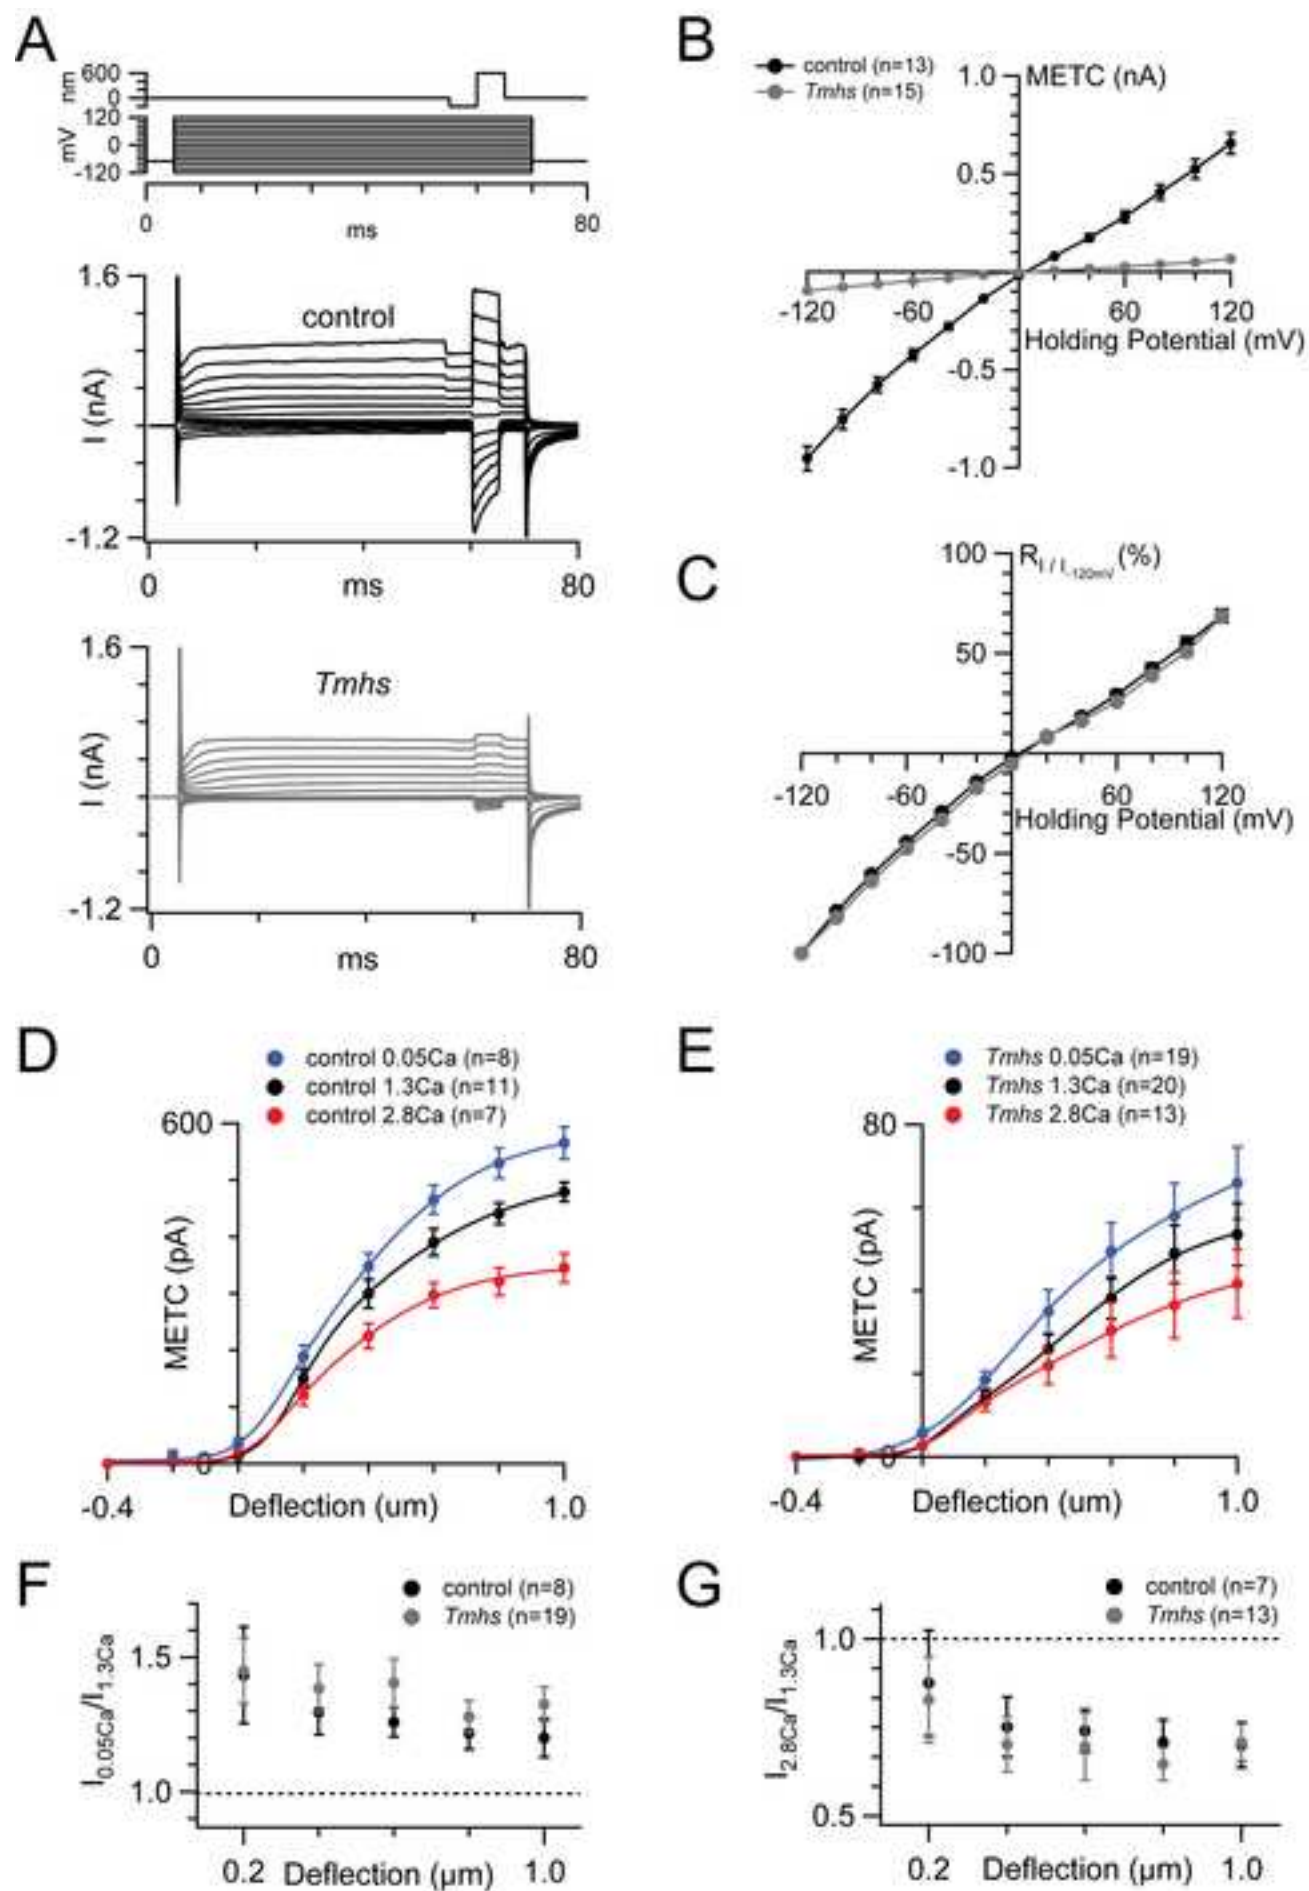

Supplement: NIHMS419407-supplement-02.pdf [file NIHMS419407-supplement-02.pdf]
